1 **SWEET11 and 15 as key players in seed filling in rice**

2

3 Jungil Yang <sup>1,2,\*</sup>, Dangping Luo <sup>4,\*</sup>, Bing Yang <sup>4</sup>, Wolf B. Frommer <sup>1,2,3,§</sup>, and Joon-Seob  
4 Eom <sup>1,2,§</sup>

5

6 <sup>1</sup> Institute for Molecular Physiology, Heinrich Heine Universität Düsseldorf and Max  
7 Planck Institute for Plant Breeding Research, Köln, Germany

8 <sup>2</sup> Department of Plant Biology, Carnegie Science, 260 Panama St., Stanford, CA 94305

9 <sup>3</sup> Institute of Transformative Bio-Molecules (ITbM), Nagoya University, Furo-cho,  
10 Chikusa-ku, Nagoya, Aichi 464-8602, Japan

11 <sup>4</sup> Department of Genetics, Development, and Cell Biology, Iowa State University, Ames,  
12 IA 50011, USA

13

14 \* equal contribution

15

16 § For correspondence: eom@mpipz.mpg.de +49 2215062385; frommew@hhu.de +49  
17 2118114826

18 **Summary**

19

- 20 • Despite the relevance of seed filling mechanisms for crop yield, we still have only a  
21 rudimentary understanding of the pathways and transport processes for supplying the  
22 caryopsis with sugars. We hypothesized that the recently identified SWEET sucrose  
23 transporters may play important roles in nutrient import pathways in the rice caryopsis.
- 24 • We used a combination of mRNA quantification, histochemical analyses, translational  
25 promoter-reporter fusions and analysis of *knock out* mutants created by genomic edit-  
26 ing to evaluate the contribution of SWEET transporters to seed filling.
- 27 • In rice caryopses, *SWEET11* and *15* had the highest mRNA levels and proteins local-  
28 ized to four key sites: the nucellus proper at early stages, the nucellar projection close  
29 to the dorsal vein, the nucellar epidermis that surrounds the endosperm, and the aleu-  
30 rone. *ossweet11;15* double *knock-out* lines accumulated starch in the pericarp while  
31 caryopses did not contain a functional endosperm.
- 32 • Jointly, SWEET11 and 15 show all hallmarks of being responsible for seed filling with  
33 sucrose efflux function at the nucellar projection and transfer across the nucellar epi-  
34 dermis/aleurone interface, delineating two major steps for apoplasmic seed filling, ob-  
35 servations that are discussed in relation to observations made in rice and barely on the  
36 relative prevalence of these two potential import routes.

37

38 **Key words:** apoplasmic pathway, caryopsis, endosperm, rice, sucrose transporter,  
39 SWEET

- 40 **Main text: 6052 words**
- 41
- 42 **Introduction: 988 words**
- 43 **Materials and Methods: 972 words**
- 44 **Results: 1421 words**
- 45 **Discussion: 1521 words**
- 46 **Acknowledgements: 34 words**
- 47 **Figure Legends and Tables: 570 words**
- 48 **Supplemental Information: 546 words**

49 **Main text: 6052 words**

50

51 **Introduction**

52 Population growth is expected to lead to an increasing need for rice production, especially  
53 in Africa (Sharma, 2014). A key question is thus how we can obtain maximal yield poten-  
54 tial. Rice grains are composed mainly of starch (over 90% in many cases;  
55 [www.knowledgebank.irri.org/ricebreedingcourse/Grain\\_quality.htm](http://www.knowledgebank.irri.org/ricebreedingcourse/Grain_quality.htm)), which derives from  
56 imported soluble carbohydrates. These carbohydrates are produced in the leaves with  
57 the help of photosynthesis and are exported mainly as sucrose via the phloem, which  
58 contains ~600 mM sucrose (Fukumorita & Chino, 1982). In order to fill the seeds, and  
59 more specifically to generate starch, cell walls and provide energy, sucrose has to be  
60 imported into developing caryopses. Phloem strands enter the seed coat, where sucrose  
61 is unloaded and transferred into the developing caryopsis to supply cells with nutrients,  
62 in particular sugars as sources of energy and as carbon skeletons for cell wall and starch  
63 biosynthesis.

64 In plants, cell-to-cell transport of sugars is thought to be mediated by apoplasmic (export  
65 from one cell by a plasma membrane transporter and subsequent import into the adjacent  
66 cell by another transport protein) or by symplasmic transfer via plasmodesmata. Other  
67 routes are conceivable, but evidence for vesicular transport processes are sparse (van  
68 den Broek *et al.*, 1997). Two of the key processes for long distance translocation are  
69 phloem loading and seed filling. The transport processes that ultimately lead to cell wall  
70 synthesis and storage product accumulation in seeds, in particular in cereal caryopses  
71 are not fully understood. To delineate sym- and apoplasmic pathways in rice caryopses,  
72 Oparka carried out a combination of ultrastructural and dye tracer studies in the early 80s  
73 (Oparka & Gates, 1981a,b, 1982, 1984). The rice caryopsis is supplied by three vascular  
74 bundles that pass through the pericarp. The dorsal vascular bundle is the major route for  
75 sugar delivery to the developing caryopsis (Oparka & Gates, 1981a; Krishnan & Daya-  
76 nandan, 2003). He found symplasmic connections between the parenchyma of the dorsal  
77 vascular bundle and the nucellar projection as well as a lipid barrier between the inner

78 integument and the nucellar epidermis that blocks the apoplasmic route, therefore requir-  
79 ing transporters for uptake and release at this site for a transcellular pathway. From these  
80 comprehensive analyses that included radiotracer analyses using  $^{14}\text{CO}_2$ , he proposed  
81 that after sucrose had been unloaded from the phloem, it diffuses along the nucellar epi-  
82 dermis from where an unknown set of sugar transporters transfers the sugar into the de-  
83 veloping endosperm. Since sucrose, upon arrival in the caryopsis through the phloem of  
84 the dorsal vascular bundle, is partially hydrolyzed by cell wall invertases (cwINVs; in par-  
85 ticular OsGIF1/OsCIN2) into glucose and fructose, one would predict the presence of  
86 both sucrose and hexose transport pathways (Wang *et al.*, 2008). At present, two classes  
87 of plasma membrane sucrose transporters (SUTs and clade 3 SWEETs) and three clas-  
88 ses of plasma membrane hexose transporters (MSTs (STPs), ERDs and clade 1 and 2  
89 SWEETs (Chen *et al.*, 2015a) are known. SWEETs are a class of seven transmembrane  
90 hexose and sucrose uniporters that function as oligomers (Xuan *et al.*, 2013). Their roles  
91 in Arabidopsis include nectar secretion, seed filling, and they have been shown to act as  
92 susceptibility factors for pathogen infections. It has been proposed that AtSWEET13 func-  
93 tions as a 'revolving door' mechanism to accelerate the transport efficacy (Feng & From-  
94 mer, 2015; Latorraca *et al.*, 2017; Han *et al.*, 2017).

95 In legume seeds, during early developmental stages, cwINVs produce hexoses from the  
96 incoming sucrose. These hexoses are thought to stimulate mitotic activity to increase cell  
97 number, while subsequently at later stages the cwINVs are switched off and sucrose  
98 transporters are induced. Sucrose is thought to then act as a differentiation signal that  
99 triggers storage product accumulation (Weber *et al.*, 2005). Specialized sucrose facilita-  
100 tors (SUFs, members of the SUT family), PsSUF1, PsSUF4 and PvSUF1 are appeared  
101 sucrose efflux in seed coats of pea and common bean (Zhou *et al.*, 2007). In monocots,  
102 specifically in maize and rice, cwINVs also play important roles in seed filling (Cheng &  
103 Chourey, 1999; Wang *et al.*, 2008). Several hexose transporters that are likely involved  
104 in import of the cwINV-derived hexoses into the caryopsis or endosperm have been iden-  
105 tified. Rice *MST4* is expressed during grain developmental stages in maternal tissues  
106 including the dorsal vascular bundle, nucellus including nucellar projection and nucellar  
107 epidermis, and aleurone layer of the filial endosperm (Wang *et al.*, 2007). *ZmSWEET4c*  
108 in maize is expressed in the BETL and necessary for seed filling and BETL differentiation.

109 The apparent ortholog *OsSWEET4* also appears to have a role in grain filling, although  
110 its detailed cell specificity and expression profile has yet to be determined (Sosso *et al.*,  
111 2015). The rice sucrose transporters *OsSUT1*, *OsSUT3* and *OsSUT4* localize to the aleu-  
112 rone (Ishimaru *et al.*, 2001; Bai *et al.*, 2016). Antisense inhibition of *OsSUT1* expression  
113 caused seed filling defects (Scofield *et al.*, 2002). Since we found that several sucrose  
114 transporting SWEETs contribute to seed filling in Arabidopsis (Chen *et al.*, 2015b), we  
115 speculate one or several orthologs in rice may play analogous roles in supplying sucrose  
116 to either the rice SUTs or cwINVs.

117 Here, we show that similar as in legumes, the hexose transporter *OsSWEET4* is predom-  
118 inantly expressed during early stages of caryopsis development, while *OsSWEET11* and  
119 15 mRNAs accumulated at higher levels during later developmental stages. Expression  
120 was found in the ovular vascular trace, nuclear epidermis and endosperm. We also  
121 demonstrate that *ossweet11* single mutant and *ossweet11;15* double mutants show re-  
122 tarded endosperm development and defected endosperm filling. Another work performed  
123 others in parallel also identified *OsSWEET11* as key to seed filling in rice (Ma *et al.*, 2017).  
124 The phenotype of the *ossweet11;15* double mutants was more severe in having an empty  
125 seed phenotype, while the pericarp of *osweet11* and *osweet11;15* mutants accumulated  
126 more starch. These results indicate that *OsSWEET11* and *OsSWEET15* are necessary  
127 for sugar efflux from the maternal nuclear epidermis as well as efflux from the ovular  
128 vascular trace to the apoplasm and may also contribute to sucrose influx into the aleu-  
129 rone.

## 130 **Materials and Methods**

### 131 **Plant materials and growth conditions**

132 The *Oryza sativa* ssp. *japonica* cultivar Kitaake was used for CRISPR-Cas9 and TALEN  
133 mediated mutagenesis in *OsSWEET11* and *OsSWEET15* genes. The methods for  
134 CRISPR-Cas9 induced mutant line (*ossweet11-1*) was described previously (Zhou *et al.*,  
135 2014). Briefly, guide RNA genes targeting the start codon ATG containing sequence (5'-  
136 TCACCAGTAGCAATGGCAGG-3') of *OsSWEET11* was used with Cas9 for transfor-  
137 mation (see Fig. 2S). While method for TALEN-induced mutant lines (*ossweet11-2*,  
138 *ossweet15-1* and *ossweet15-2*) was also described (Li *et al.*, 2014). One pair of TALENs  
139 for *OsSWEET11* and another pair of TALENs for *OsSWEET15* were designed and engi-  
140 neered for rice transformation. For detailed sequence and location of TALEN targets, see  
141 Fig. 2S. Double mutants (*ossweet11-1; 15-1* and *ossweet11-2; 15-2*) were created by  
142 crossing. Rice wild-type plants and mutants were grown either in field conditions (Stanford  
143 University Campus, CA, USA) or in greenhouses (Stanford and ISU) under long-day con-  
144 ditions (14h day/10h night, 28-30°C).

### 145 **Genotyping of rice plants**

146 Rice genomic DNA was extracted using CTAB method. PCR was performed using ExTaq  
147 DNA polymerase (Clontech, Mountain View, CA, USA) with a melting temperature of 56°C  
148 and 53°C for *OsSWEET11* and *OsSWEET15*, respectively (for primers, see Supplemen-  
149 tary Table 1). The PCR-amplicons from the mutant alleles has been sequenced. Chro-  
150 matograms were read and aligned using BioEdit.

### 151 **RNA isolation and transcript analyses**

152 Total RNA was isolated using the Spectrum™ Plant total RNA kit (Sigma, St. Louis, MO,  
153 USA) or the Trizol method (Invitrogen, Carlsbad, CA, USA) and first strand cDNA was  
154 synthesized using Quantitect reverse transcription Kit (Qiagen, Hilden, Germany). qRT-  
155 PCR to determine expression level was performed using the LightCycler 480 system  
156 (Roche, Penzberg, Germany), with the  $2^{-\Delta Ct}$  method for relative quantification. Specific  
157 primers for *OsSWEET11* and *OsSWEET15* were used and *OsUBI1* was served as inter-  
158 nal control gene (see Supplementary Table 1).

## 159 **Generation of *OsSWEET11* and *OsSWEET15* reporter constructs**

160 The 2,334 bp GUSplus coding sequence with nopaline synthase terminator were ampli-  
161 fied by PCR from pC1305.1 (Cambia, Canberra and Brisbane, Australia). The amplified  
162 fragment was subcloned into the pJET2.1/blunt vector (Thermo Fisher, Waltham, MA,  
163 USA) and confirmed by sequencing. The cloned fragment digested with *SacI* and *EcoRI*  
164 was further subcloned into the plant transformation vector pC1300intC to generate a pro-  
165 moterless GUSplus coding vector. For tissue specificity analysis, total 4,354 bp genomic  
166 clone containing 2,106 bp of the 5' upstream region and 2,248 bp of the entire coding  
167 region of the *OsSWEET11* gene and total 4,193 bp genomic clone containing 2,069 bp  
168 of the 5' upstream region and 2,124 bp of the entire coding region of the *OsSWEET15*  
169 gene without stop codon was amplified by PCR using Kitaake genomic DNA as a tem-  
170 plate, respectively (primers: Supplementary Table 1). The amplified product was sub-  
171 cloned into a pJET2.1/blunt vector and confirmed by sequencing. The cloned fragment  
172 digested with *HindIII* and *BamHI* for *OsSWEET11* and *XbaI* and *KpnI* for *OsSWEET15*  
173 were further inserted in front of GUSplus coding sequence digested with *HindIII/BamHI*  
174 and *XbaI/KpnI*, respectively. The resulting *pOsSWEET11:gOsSWEET11-GUSplus* and  
175 *pOsSWEET15:gOsSWEET15-GUSplus* constructs were used to transform rice Kitaake.  
176 18 and 13 independent lines were obtained for *pOsSWEET11:gOsSWEET11-GUSplus*  
177 and *pOsSWEET15:gOsSWEET15-GUSplus*, respectively, with similar expression pat-  
178 tern.

## 179 **Histochemical GUS analyses**

180 Rice immature seeds at 5 DAP (days after pollination) from  
181 *pOsSWEET11:gOsSWEET11-GUS-8* and *pOsSWEET15:gOsSWEET15-GUS-14* were  
182 collected and stained to test cell-type specific expression pattern analysis in developing  
183 caryopses. Samples were collected in 90% cold acetone for fixation, vacuum infiltrated  
184 for 10 min and incubated for 30 min at room temperature. Seeds were vacuum infiltrated  
185 in staining buffer [Staining solution w/o 5-bromo-4-chloro-3-indole-beta-glucuronide (X-  
186 Gluc)] on ice for 10 min. Solution was changed with GUS staining solution [50 mM sodium  
187 phosphate (pH 7.0), 10 mM EDTA, 20% (v/v) methanol, 0.1 % (v/v) Triton X-100, 1mM  
188 potassium ferrocyanide, 1mM potassium ferricyanide, 2 mM 5-bromo-4-chloro-3-indole-



189 beta-glucuronide (X-Glc) dissolved in dimethyl sulfoxide]. Samples were incubated at 37  
190 °C. After 20 min staining, samples were incubated series of ethanol (20%, 35%, 50%) at  
191 room temperature for 30 min each. For paraffin section, seeds were fixed using FAA for  
192 30 min [50% (v/v) ethanol, 3.7% (v/v) formaldehyde, 5% (v/v) acetic acid]. Dehydration  
193 was performed with ethanol series (70%, 80%, 90%, 100%, each for 30 min) and 100 %  
194 tert-butanol. Samples were transferred and embedded in Histosec pastilles (Millipore,  
195 Billerica, MA, USA). Cross sections (8 µm) were performed by rotary microtome (Jung  
196 RM 2025, Wetzlar, Germany). Specimens were observed with Nikon eclipse e600 micro-  
197 scope. Images for GUS histochemistry in Figure 1 were enhanced uniformly in Photoshop  
198 by adjusting brightness (+5), contrast (+7), and blue color balance (+4) to increase the  
199 ability to observe the X-gluc staining.

#### 200 **Plastic embedding and sectioning**

201 Wild-type, *ossweet11-1* and *ossweet11-1;15-1* seeds were fixed using 4% PFA [1X PBS  
202 buffer (37 mM NaCl, 10 mM Na<sub>2</sub>HPO<sub>4</sub>, 2.7 mM KCl, 1.8mM KH<sub>2</sub>PO<sub>4</sub> and a pH of 7.4) with  
203 4% paraformaldehyde], vacuum infiltrated for 15 min and incubated overnight. Dehydra-  
204 tion of samples were performed in ethanol with a series of concentration (10%, 30%, 50%,  
205 75% and 95%). Plastic embedding was performed accordingly to the LR White embed-  
206 ding kit protocol (Electron Microscopy Science). Cross-sections (1 µm) were performed  
207 using Ultracut (Reichert-Jung, Wetzlar, Germany), stained with 0.1% Safranin O for 30  
208 second and washed twice with distilled water, followed by 3 min starch staining for 3 min  
209 with Lugol's staining solution. Specimens were observed with Nikon eclipse e600 micro-  
210 scope.

#### 211 **FRET sucrose sensor analysis in HEK293T cells**

212 The *OsSWEET11* and *OsSWEET15* coding sequences were cloned into the Gateway  
213 entry vector pDONR221f1, and then cloned into vector pcDNA3.2V5 by LR recombination  
214 reaction for expression in HEK293T cells. HEK293T cells were co-transfected with a plas-  
215 mid carrying the *OsSWEET11* or *OsSWEET15* and the sucrose sensor FLIPsuc90µ-  
216 sCsA, using Lipofectamine 2000 (Invitrogen, Carlsbad, CA, USA). For FRET imaging,  
217 HBSS medium was used to perfuse HEK293T/ FLIPsuc90µ-sCsA cells pulsed with 20

218 mM sucrose. Image acquisition and analysis were performed as previously described  
219 (Chen *et al.*, 2012). Empty vector was served as a negative control.

## 220 **Results**

### 221 **Identification of OsSWEET11 and OsSWEET15 in rice caryopses**

222 To identify SWEETs that are expressed specifically in rice caryopses, we analyzed public  
223 microarray data from RiceXPro ([ricexpro.dna.affrc.go.jp](http://ricexpro.dna.affrc.go.jp)). We focused on members of  
224 clade 3 since they had been shown to function as plasma membrane sucrose transport-  
225 ers. Among the five clade 3 SWEETs analyzed, *OsSWEET11* and *15* had the highest  
226 mRNA levels in the endosperm between 7 and 14 DAP (Fig. S1). To validate the micro-  
227 array data, we harvested immature seeds at different developmental stages from green-  
228 house-grown plants and re-analyzed mRNA levels of *OsSWEET11* and *15* by qRT-PCR.  
229 For comparison, we analyzed *OsSWEET4*, which had been shown to play an important  
230 role as a hexose transporter in seed development (Sosso *et al.*, 2015)(Fig. 1). At 1 DAP,  
231 *SWEET4* had the highest mRNA levels, but already at 3 DAP, levels had declined about  
232 ~3-fold. In comparison, *OsSWEET11* was low at DAP1, but equal to *OsSWEET4* at 3  
233 DAP. *OsSWEET11* gradually increased throughout seed development. While in the mi-  
234 croarrays *OsSWEET15* was only 2-3x lower compared to *OsSWEET11*, our qRT-PCR  
235 analysis indicated a much lower relative level however the developmental pattern of  
236 *OsSWEET15* mRNA levels was similar to that of *OsSWEET11*.

### 237 **OsSWEET11 plays a key role in seed filling**

238 *OsSWEET11* had previously been shown to function as a plasma membrane sucrose  
239 transporter (Chen *et al.*, 2012). Since *OsSWEET11* was by far the most highly expressed  
240 SWEET gene, we hypothesized that *knock-out* mutants might be affected in seed filling.  
241 Two independent *ossweet11* mutants, one carrying a single nucleotide deletion leading  
242 to a frameshift was created by CRISPR-Cas9 and a second TALEN-derived mutant car-  
243 rying a 489 bp deletion were characterized phenotypically (Fig. S2). In the greenhouse,  
244 both mutants had incompletely filled seeds at maturity (Fig. 2a). Depending on the growth  
245 conditions, the phenotype was more or less severe (see for example Fig. 2 and Fig. S3).  
246 The effects became more severe in paddy field conditions (single field experiment in  
247 2016; see also parallel study (Ma *et al.*, 2017). Moreover, panicle development of

248 *ossweet11* was significantly delayed as apparent from panicles containing chlorophyll in  
249 the mutant still at 40 DAP (Fig. 2c,d). Maturity, i.e. loss of chlorophyll was completed in  
250 *ossweet11* mutants only much later (>60 DAP). As a result, mutants had a significantly  
251 reduced yield (both percentage of mature seeds after harvest and 1000- grain weight;  
252 Fig. S3a,b). Of note however, plant height, spikelet number and panicle length were sim-  
253 ilar as in wild-type also in paddy field conditions (Figs. 2c, S3c,d).

#### 254 **OsSWEET11 accumulation in nucellar projection, nucellar epidermis and aleurone**

255 Oparka had predicted symplasmic diffusion of sugar in the pericarp and apoplasmic  
256 transport at the nucellar epidermis-aleurone interface all around the endosperm, which  
257 contrasts the sucrose import patterns found in developing barely seeds, where the main  
258 import route was through the nucellar projection (Oparka & Gates, 1984; Melkus *et al.*,  
259 2011). To determine whether OsSWEET11 exports sucrose at the nucellar projection or  
260 the nucellar epidermis/aleurone interface, we analyzed transgenic rice plants expressing  
261 translational GUS fusions containing a 2kb promoter fragment and the whole coding re-  
262 gion including all introns. Crude histochemical GUS analysis of caryopses showed com-  
263 parable GUS staining in seeds in 8 out of 18 independent transformants. Two independ-  
264 ent lines were used for a more detailed analysis. In early stages (up to 3 DAP), we ob-  
265 serve GUS activity in maternal tissues including the ovular vascular trace and the nucel-  
266 lus, possibly indicating a role in remobilization of carbohydrates during nucellar degrada-  
267 tion (Fig. S4). At 5 DAP, GUS activity was detected in the ovular vascular trace, the nu-  
268 cellar projection, the nucellar epidermis surrounding the developing endosperm, the re-  
269 maining nucellar proper and also in the aleurone layer of the endosperm (Fig. 3a-c). To  
270 our surprise, we find OsSWEET11 expression in nucellar projection as well as the nucel-  
271 lar epidermis, and in addition also in the outermost endosperm cell layer, the aleurone,  
272 providing a potential path for sucrose export out of the nucellar projection into the endo-  
273 sperm, and a parallel pathway for export from the circumferential nucellar epidermis and  
274 then subsequently a potential import via OsSWEET11 into the aleurone. A parallel study  
275 observed a similar expression pattern using a transcriptional GUS fusion (Ma *et al.*, 2017).

#### 276 **Potential compensation for *ossweet11* deficiency by other SWEETs**

277 The relatively weak phenotype of the *ossweet11* mutants may either indicate the exist-  
278 ence of alternative genes and pathways, or could be due to compensation. Analysis of  
279 the expression levels of clade 3 SWEET genes in the *ossweet11* mutant showed that  
280 *OsSWEET13* mRNA levels were slightly increased, however the absolute levels were  
281 extremely low. The mRNA levels of *OsSWEET15* were about twofold higher in *ossweet11*  
282 seeds compared to wild-type (Fig. 4). Since depending on the experiment, *OsSWEET15*  
283 was expressed at only slightly lower levels compared to *OsSWEET11* and was further-  
284 more candidate that may contribute to compensation in the mutant, we first tested  
285 whether it functions as a sucrose transporter, determined its expression pattern in devel-  
286 oping caryopses and then analyzed knock-out mutants. As one may have predicted,  
287 *OsSWEET15* also functioned as a sucrose transporter when co-expressed with a sucrose  
288 sensor in HEK293T cells (Fig. S5). Translational GUS fusions of the *OsSWEET15* gene  
289 driven by their native promoter showed similar tissue specificity as compared to  
290 *OsSWEET11* (13 independent lines): i.e. GUS activity was detected at early stages in the  
291 nucellus proper, and later in the ovular vascular trace, the nucellar projection and the  
292 aleurone (Fig. 3d,e). At 9 DAP, *OsSWEET15* GUS activity was also detected in nucellar  
293 epidermis (Fig. 3f). The two SWEET transporters exhibit similar expression pattern in the  
294 developing seeds, especially ovular vascular and interface between the nucellar epider-  
295 mis and the aleurone layer, assuming redundant roles during seed development. How-  
296 ever, on their own, two independent *ossweet15* knock-out mutants generated via  
297 CRISPR-Cas9 (frameshift mutations that prevent production of a functional *OsSWEET15*  
298 protein, Fig. S2) did not show any detectable phenotypic differences compared to wild-  
299 type in 4 independent experiments (Fig. 2b).

### 300 ***OsSWEET11* and *15* are essentially for seed filling**

301 Since the seed filling of *ossweet11* mutants was only partially affected relative to  
302 *ossweet4* mutants (Sosso *et al.*, 2015), and *OsSWEET15* appeared to be expressed in  
303 the same cell types to substantial levels, and even possibly compensates in part for  
304 *OsSWEET11* deficiency in the mutant, we generated *ossweet11;15* double mutants for  
305 both alleles of the two loci. In greenhouse conditions both at ISU and Stanford, the double  
306 mutant phenotype was very severe, much more than the single *ossweet11* mutant (Fig.  
307 5). The differences were even more severe in the ISU greenhouses, where *ossweet11*

308 showed only a minor phenotype, whereas the caryopses of the double mutant were se-  
309 verely affected (Fig. S6). A detailed time series showed that phenotypic differences be-  
310 came apparent at ~5 DAP (Fig. 5a). Differences became much stronger at 7 DAP, a time  
311 point at which *ossweet11* mutants already started to develop a wrinkled grain morphol-  
312 ogy, while *ossweet11;15* was characterized by grains that were flattened with a smaller  
313 diameter (Fig. 5a,b). Sections through the grain showed that the mutants were endo-  
314 sperm-deficient and either had only remnants of the endosperm or lost the endosperm  
315 completely (Fig. 5c). Cytohistological analyses of resin-embedded sections showed that  
316 cellularization of the endosperm started at ~3 DAP in both wild-type and *ossweet11*, while  
317 cellularization was not observed in *ossweet11;15* mutant (Fig. S7). The cellularization of  
318 the endosperm was completed and nucellus were degenerated in the wild-type from 5 to  
319 7 DAP (Fig. S7a). In the *ossweet11* mutant, endosperm was not fully cellularized and  
320 degradation of nucellus were delayed (Fig. S7b). In the *ossweet11;15* mutant, endosperm  
321 cells defected cellularization and nucellus remained until 7 DAP (Fig. S7c).

### 322 **Starch accumulation in the pericarp of *ossweet11;15* double mutants**

323 Based on the localization of OsSWEET11 and 15, we predicted that inhibition of the trans-  
324 porters would lead to starch accumulation in cells that export sucrose and cells outside  
325 the endosperm. In wild-type, starch is stored transiently in the pericarp until 7 - 9 DAP.  
326 Rapid starch degradation in the pericarp correlated with starch accumulation in the endo-  
327 sperm starting ~7 DAP (Wu *et al.*, 2016). We found starch in the endosperm, but only  
328 residual amounts in the pericarp of wild-type caryopses (Fig. 6a,d). By contrast, starch  
329 accumulated to high levels in the pericarp of the *ossweet11* mutant (Fig. 6b,e). In  
330 *ossweet11;15* double mutants, starch accumulated to even higher levels in the pericarp,  
331 while the endosperm did not show substantial starch levels (Fig. 6c,f). The accumulation  
332 of starch in the pericarp of *ossweet11* and *ossweet11;15* double mutants supports the  
333 critical roles of OsSWEET11 and OsSWEET15 in sugar translocation and mobilization  
334 towards the developing endosperm.

## 335 **Discussion**

336 We draw five key findings from the results of a combination of analyses comprising gene  
337 expression, translational reporters to map tissue-specific protein accumulation, nuclease-  
338 induced knock out mutants: (i) OsSWEET11 and 15 are the most highly expressed su-  
339 crose transporting clade 3 SWEETs in the rice caryopsis, (ii) if we assume that they mark  
340 apoplasmic import routes, sucrose can enter both directly below the vein via the nucellar  
341 projection as well as the circumferential nucellar epidermis; (iii) they may not only play  
342 roles in cellular efflux at these two sites, but also be responsible for importing sucrose  
343 into the aleurone cells; (iv) OsSWEET11 and 15 are both contribute to seed filling with  
344 redundant roles, but since the single *ossweet15* mutant alone has no apparent phenotypic  
345 differences to wild-type, OsSWEET11 appears to function as the dominant transporter,  
346 consistent with the higher levels of mRNA; (v) *OsSWEET4*, since it is mainly expressed  
347 at early stages of development, may cooperate with the cell wall invertase *cwINV2* (*Os-*  
348 *CIN2*, *GIF1*) in hexose import in the vicinity of the dorsal vein, while *OsSWEET11/15* are  
349 jointly contribute to seed filling at later stages. The findings made here for the *O. sativa*  
350 cv. Kitaake from *OsSWEET11* are similar to those from a parallel study that used *O.*  
351 *sativa* cv. Nipponbare (Ma *et al.*, 2017). The main difference is that our lines showed a  
352 weaker phenotype when grown in greenhouse conditions relatively to the field experi-  
353 ments made with Nipponbare (Ma *et al.*, 2017).

## 354 **Pathways for seed filling**

355 The tissue-specific expression of *OsSWEET11* and 15 in parenchymatic cells of the vas-  
356 cular bundle, the nucellar projection, the nucellar epidermis and the aleurone layers in  
357 endosperm indicates specific role of *OsSWEET11* and 15 in sucrose translocation into  
358 developing caryopses. Here we proposed possible model for sucrose transporting from  
359 ovular vascular bundle to endosperm (Fig. 7). There appear to be four locations that re-  
360 quire sucrose transporters: **1. Parenchymatic cells in the vascular bundle:** a localiza-  
361 tion that may be expected based on the *OsCIN2* localization which requires efflux of su-  
362 crose (and subsequent import of hexoses for providing sucrose as a substrate (Wang *et*  
363 *al.*, 2008). Of note, the *oscin2/gif1* *cwINV* mutant has a clearly distinct phenotypes with  
364 markedly more grain chalkiness and is thus not similar to *ossweet11* (Wang *et al.*, 2008).



365 **2. Nucellar epidermis:** this is also an expected location that is compatible with Oparka's  
366 work that indicates that the symplasmic pathway appears to be blocked, thus requiring  
367 transporters at the nucellar epidermis (Oparka & Gates, 1981a,b, 1982, 1984). **3. Aleu-**  
368 **rone:** an unexpected location which requires sucrose influx via plasma membrane trans-  
369 porters. The same localization of OsSWEET11 was also observed in a parallel study (Ma  
370 *et al.*, 2017). The authors found this unexpected, since it was a location that requires  
371 influx and is not expected to efflux sucrose. However, SWEETs appear to function as  
372 uniporters, thus the sucrose gradient simply determines the direction of flux. We had pre-  
373 viously found that SWEET4 in maize and rice were likely key to the import of cwINV-  
374 derived hexoses in seeds (Sosso *et al.*, 2015). A sucrose gradient across the two cell  
375 types (nucellar epidermis and aleurone) driven by a high rate of delivery from the maternal  
376 side and rapid conversion in the endosperm would allow the use of the same transporters  
377 on both cell types. This situation is remotely similar as in the human intestine, where  
378 transcellular transport across the intestinal epithelia is mediated by GLUT2 on both the  
379 apical and basal membrane under conditions where the glucose concentrations in the  
380 lumen exceed those of the blood stream (Kellett *et al.*, 2008). In addition to the two  
381 SWEETs, *SUTs*, which are expressed in the aleurone, may contribute to secondary active  
382 sucrose import into the aleurone (Ishimaru *et al.*, 2001; Scofield *et al.*, 2002; Bai *et al.*,  
383 2016). **4. Nucellar projection:** The presence of OsSWEET11 and 15 in the cells of the  
384 nucellar projection may appear as the most surprising site, since plasma membrane su-  
385 crose transport is not in line with radiotracer import studies, which indicated that in rice,  
386 the import of sugars occurs exclusively via the nucellar epidermis-aleurone pathway  
387 (Oparka & Gates, 1981b). However, others have suggested that the nucellar projection  
388 may help to transporting sugars to the developing endosperm also in rice (Krishnan &  
389 Dayanandan, 2003). Importantly, the nucellar projection pathway appears to be the main  
390 pathway for sugar import in barely caryopses as shown by magnetic resonance imaging  
391 (MRI)(Melkus *et al.*, 2011). Of note, we are aware that by contrast to Oparka's radiotracer  
392 studies, we do not measure actual translocation of assimilates, but rather the presence  
393 of a protein, and we do not know whether the two SWEETs are active at the plasma  
394 membrane of these cells. Nevertheless we suggest that it may be useful to reassess  
395 sugar entry pathways, for example by MRI at different stages and in different varieties.

396 One possible difference could be that Oparka used an *indica* rice variety (IR 2153-338-  
397 3), while the *japonica* variety Kitaake was used for all experiments shown here; Nippon-  
398 bare was used by the parallel study that localized a transcriptional GUS fusion of the  
399 OsSWEET11 promoter to the same cells as the translational fusions in our work (Ma *et*  
400 *al.*, 2017). Alternatively, these pathways may be used at different stages of development.  
401 Notably, the three Arabidopsis transporters SWEET11, 12 and 15 which play critical roles  
402 for sucrose efflux from the seed coat also showed very complex changes in cellular ex-  
403 pression during seed development (Chen *et al.*, 2015b).

#### 404 **Starch in the pericarp as a transient buffer**

405 In rice caryopsis development, large amount of starch grains accumulated in pericarp at  
406 6 DAP, followed by those starch grains degraded from 7 to 9 DAP (Wu *et al.*, 2016). This  
407 type of starch accumulation and degradation has been observed in pericarp of barely and  
408 wheat (Radchuk *et al.*, 2009; Xiong *et al.*, 2013). Starch accumulation occurred in the  
409 *ossweet11* and *ossweet11;15* of pericarp at 9 DAP (Fig. 6), suggesting the presence of  
410 one route for delivery of sucrose in the pericarp.

411 Ma *et al.* (Ma *et al.*, 2017) also localized transcriptional reporter fusions of OsSWEET11  
412 to the pigment strand close to the main vascular trace and found a severe seed filling  
413 phenotype when analyzing plants grown in the field. In our greenhouse experiments, the  
414 phenotypic effect of *ossweet11* mutations was a lot less severe, in some cases even  
415 marginal, intimating a strong effect of the growth conditions, possibly light and nutrition  
416 on the phenotype. Our work indicates, based on the similarity in steady state RNA levels,  
417 timing of mRNA accumulation, tissue specificity and the combined effect observed in dou-  
418 ble knock out mutants that OsSWEET15 can compensate for OsSWEET11 deficiency.

#### 419 **Developmental control of seed filling**

420 Rice caryopsis occurred dynamical changes in cell expansion, cell wall thickening, and  
421 starch grain accumulation (Wu *et al.*, 2016). Expression levels of *OsSWEET11* and  
422 *OsSWEET15* are gradually increased during caryopsis development. In contrast  
423 *OsSWEET4*, which is expressed mainly at the base of the caryopsis, and mutation strong  
424 seed filling defect, however timing very different, very high early and then declining (Fig.  
425 1). Early seed development, imported sucrose released from maternal tissue is cleaved



426 by an extracellular invertase. Similarly with *OsSWEET4*, *OsCIN1* and *OsCIN2* are mainly  
427 expressed early stage (Hirose *et al.*, 2002; Cho *et al.*, 2005). Since *OsSWEET4* belongs  
428 to clade 1 SWEET and shown as a glucose transporter (Sosso *et al.*, 2015), role of clade  
429 1 glucose transporter might be important for early seed development, but clade 3  
430 SWEETs might be important for late seed development.

### 431 **Relevance for pathogen susceptibility**

432 The finding that *OsSWEET11* and 15 play important roles in seed filling is also relevant  
433 in the context of the fact that *OsSWEET11* serves as a blight susceptibility gene (Yang *et al.*,  
434 2006; Yuan *et al.*, 2010; Antony *et al.*, 2010; Chen *et al.*, 2010). Ectopic expression  
435 of *OsSWEET11* is activated by pathovar-specific effectors of the blight pathogen *Xan-*  
436 *thomonas oryzae pv oryzae*, and mutations in the effector binding sites in the  
437 *OsSWEET11* promoter lead to resistance to Xoo (Yang *et al.*, 2006; Yuan *et al.*, 2010;  
438 Antony *et al.*, 2010). Therefore, it will be important to ensure that engineering of the  
439 *OsSWEET11* promoter in resistant lines retains proper *OsSWEET11* expression in seeds  
440 to ensure that resistant lines do not carry a yield penalty. This goal appears feasible since  
441 apparently mutants (*xa13*) that are used by breeders do not show yield deficiencies (Laha  
442 *et al.*, 2016).

### 443 **Conclusions**

444 The analysis of SWEET gene expression in rice caryopses together with the characteri-  
445 zation of knockout mutants in the most highly expressed clade 3 SWEETs 11 and 15  
446 demonstrates that *OsSWEET11* and 15 play central roles in seed filling. The cellular ex-  
447 pression patterns of *OsSWEET11* and 15 indicate that there may be multiple apoplasmic  
448 pathways for sucrose entry into the endosperm. A careful analysis of the timing and lo-  
449 calization of other sugar transporters of the SWEET, SUT and MST families as well as  
450 the cell wall invertases, and an analysis of sucrose import by MRI in a variety of rice  
451 cultivars will help to further delineate the sugar import pathways and hopefully contribute  
452 to the knowledgebase for engineering improve yield potential in rice.

453 **Acknowledgments**

454 We thank Davide Sosso for helpful discussions. This research was supported by grants  
455 from the National Science Foundation research (IOS-1258103) to WF and BY and the  
456 Department of Energy (DE-FG02- 04ER15542) to WF.

457 **Author contributions**

458 JY, JSE, BY and WF conceived and designed the experiments; JY, JSE and DL per-  
459 formed the experiments and collected the data, executed the data analyses, and rendered  
460 the figures; and all authors contributed to the interpretation of the results, wrote and re-  
461 vised earlier drafts – they approve the final version of this manuscript and agree to be  
462 held accountable for the content.

463 **References**

464 **Antony G, Zhou J, Huang S, Li T, Liu B, White F, Yang B. 2010.** Rice *xa13* recessive  
465 resistance to bacterial blight is defeated by induction of the disease susceptibility gene  
466 *Os-11N3*. *The Plant Cell* **22**: 3864–3876.

467 **Bai A-N, Lu X-D, Li D-Q, Liu J-X, Liu C-M. 2016.** NF-YB1-regulated expression of su-  
468 crose transporters in aleurone facilitates sugar loading to rice endosperm. *Cell Re-*  
469 *search* **26**: 384–388.

470 **van den Broek PJ, van Gompel AE, Luttk MA, Pronk JT, van Leeuwen CC. 1997.**  
471 Mechanism of glucose and maltose transport in plasma-membrane vesicles from the  
472 yeast *Candida utilis*. *Biochemical Journal* **321**: 487–495.

473 **Chen L-Q, Cheung LS, Feng L, Tanner W, Frommer WB. 2015a.** Transport of sugars.  
474 *Annual Review of Biochemistry* **84**: 865–894.

475 **Chen L-Q, Hou B-H, Lalonde S, Takanaga H, Hartung ML, Qu X-Q, Guo W-J, Kim J-**  
476 **G, Underwood W, Chaudhuri B, et al. 2010.** Sugar transporters for intercellular ex-  
477 change and nutrition of pathogens. *Nature* **468**: 527–532.

478 **Chen L-Q, Lin IW, Qu X-Q, Sosso D, McFarlane HE, Londoño A, Samuels AL,**  
479 **Frommer WB. 2015b.** A cascade of sequentially expressed sucrose transporters in the  
480 seed coat and endosperm provides nutrition for the *Arabidopsis* embryo. *The Plant Cell*  
481 **27**: 607–619.

482 **Chen L-Q, Qu X-Q, Hou B-H, Sosso D, Osorio S, Fernie AR, Frommer WB. 2012.**  
483 Sucrose Efflux Mediated by SWEET Proteins as a Key Step for Phloem Transport. *Sci-*  
484 *ence* **335**: 207–211.

485 **Cheng W-H, Chourey PS. 1999.** Genetic evidence that invertase-mediated release of  
486 hexoses is critical for appropriate carbon partitioning and normal seed development in  
487 maize. *Theoretical and Applied Genetics* **98**: 485–495.

- 488 **Cho J-I, Lee S-K, Ko S, Kim H-K, Jun S-H, Lee Y-H, Bhoo SH, Lee K-W, An G, Hahn**  
489 **T-R, et al. 2005.** Molecular cloning and expression analysis of the cell-wall invertase  
490 gene family in rice (*Oryza sativa* L.). *Plant Cell Reports* **24**: 225–236.
- 491 **Feng L, Frommer WB. 2015.** Structure and function of SemiSWEET and SWEET  
492 sugar transporters. *Trends in Biochemical Sciences* **40**: 480–486.
- 493 **Fukumorita T, Chino M. 1982.** Sugar, amino acid and inorganic content in rice phloem  
494 sap. *Plant Cell Physiology* **23**: 273–283.
- 495 **Han L, Zhu Y, Liu M, Zhou Y, Lu G, Lan L, Wang X, Zhao Y, Zhang XC. 2017.** Molec-  
496 ular mechanism of substrate recognition and transport by the AtSWEET13 sugar trans-  
497 porter. *Proceedings of the National Academy of Sciences of the USA*. **38**:10089-10094.
- 498 **Hirose T, Takano M, Terao T. 2002.** Cell wall invertase in developing rice caryopsis:  
499 molecular cloning of *OsCIN1* and analysis of its expression in relation to its role in grain  
500 filling. *Plant & Cell Physiology* **43**: 452–459.
- 501 **Ishimaru K, Hirose T, Aoki N, Takahashi S, Ono K, Yamamoto S, Wu J, Saji S,**  
502 **Baba T, Ugaki M, et al. 2001.** Antisense expression of a rice sucrose transporter *Os-*  
503 *SUT1* in rice (*Oryza sativa* L.). *Plant & Cell Physiology* **42**: 1181–1185.
- 504 **Kellett GL, Brot-Laroche E, Mace OJ, Leturque A. 2008.** Sugar absorption in the in-  
505 testine: the role of GLUT2. *Annual Review of Nutrition* **28**: 35–54.
- 506 **Krishnan S, Dayanandan P. 2003.** Structural and histochemical studies on grain-filling  
507 in the caryopsis of rice (*Oryza sativa* L.). *Journal of Biosciences* **28**: 455–469.
- 508 **Laha GS, Sailaja B, Srinivas Prasad M, Ladhakshmi D, Krishnaveni D, Singh R,**  
509 **Prakasam V, Yugander A, Kannan C, Valarmathi P, et al. 2016.** Changes in Rice Dis-  
510 ease Scenario in India: An Analysis from Production Oriented Survey. ICAR-Indian Insti-  
511 tute of Rice Research, Rajendranagar, Hyderabad.

- 512 **Latorraca NR, Fastman NM, Venkatakrishnan AJ, Frommer WB, Dror RO, Feng L.**  
513 **2017.** Mechanism of substrate translocation in an alternating access transporter. *Cell*  
514 **169:** 96–107.e12.
- 515 **Li T, Liu B, Chen CY, Yang B. 2014.** TALEN utilization in rice genome modifications.  
516 *Methods* **69:** 9–16.
- 517 **Ma L, Zhang D, Miao Q, Yang J, Xuan Y, Hu Y. 2017.** Essential Role of Sugar Trans-  
518 porter OsSWEET11 During the Early Stage of Rice Grain Filling. *Plant & Cell Physiol-*  
519 *ogy* **58:** 863–873.
- 520 **Melkus G, Rolletschek H, Fuchs J, Radchuk V, Grafahrend-Belau E, Sreenivasulu**  
521 **N, Rutten T, Weier D, Heinzl N, Schreiber F, et al. 2011.** Dynamic  $^{13}\text{C}/^1\text{H}$  NMR im-  
522 aging uncovers sugar allocation in the living seed. *Plant Biotechnology Journal* **9:** 1022–  
523 1037.
- 524 **Oparka KJ, Gates P. 1981a.** Transport of assimilates in the developing caryopsis of  
525 rice (*Oryza sativa* L.). Ultrastructure of the pericarp vascular bundle and its connections  
526 with the aleurone layer. *Planta* **151:** 561–573.
- 527 **Oparka KJ, Gates P. 1981b.** Transport of assimilates in the developing caryopsis of  
528 rice (*Oryza sativa* L.). The pathways of water and assimilated carbon. *Planta* **152:** 388–  
529 396.
- 530 **Oparka KJ, Gates PJ. 1982.** Ultrastructure of the developing pigment strand of rice  
531 (*Oryza sativa* L.) in relation to its role in solute transport. *Protoplasma* **113:** 33–43.
- 532 **Oparka KJ, Gates P. 1984.** Sink anatomy in relation to solute movement in rice (*Oryza*  
533 *sativa* L.): A summary of findings. *Plant Growth Regulation* **2:** 297–307.
- 534 **Radchuk VV, Borisjuk L, Sreenivasulu N, Merx K, Mock H-P, Rolletschek H, Wo-**  
535 **bus U, Weschke W. 2009.** Spatiotemporal Profiling of Starch Biosynthesis and Degrada-  
536 tion in the Developing Barley Grain. *Plant Physiology* **150:** 190–204.

- 537 **Scofield GN, Hirose T, Gaudron JA, Furbank RT, Upadhyaya NM, Ohsugi R. 2002.**  
538 Antisense suppression of the rice transporter gene, *OsSUT1*, leads to impaired grain fill-  
539 ing and germination but does not affect photosynthesis. *Functional Plant Biology* **29**:  
540 815–826.
- 541 **Sosso D, Luo D, Li Q-B, Sasse J, Yang J, Gendrot G, Suzuki M, Koch KE, McCarty**  
542 **DR, Chourey PS, et al. 2015.** Seed filling in domesticated maize and rice depends on  
543 SWEET-mediated hexose transport. *Nature Genetics* **47**: 1489–1493.
- 544 **Wang E, Wang J, Zhu X, Hao W, Wang L, Li Q, Zhang L, He W, Lu B, Lin H, et al.**  
545 **2008.** Control of rice grain-filling and yield by a gene with a potential signature of do-  
546 mestication. *Nature Genetics* **40**: 1370–1374.
- 547 **Wang Y, Xu H, Wei X, Chai C, Xiao Y, Zhang Y, Chen B, Xiao G, Ouwerkerk PBF,**  
548 **Wang M, et al. 2007.** Molecular cloning and expression analysis of a monosaccharide  
549 transporter gene *OsMST4* from rice (*Oryza sativa* L.). *Plant Molecular Biology* **65**: 439–  
550 451.
- 551 **Weber H, Borisjuk L, Wobus U. 2005.** Molecular physiology of legume seed develop-  
552 ment. *Annual Review of Plant Biology* **56**: 253–279.
- 553 **Wu X, Liu J, Li D, Liu C-M. 2016.** Rice caryopsis development II: Dynamic changes in  
554 the endosperm. *Journal of Integrative Plant Biology* **58**: 786–798.
- 555 **Xiong F, Yu XR, Zhou L, Wang F, Xiong AS. 2013.** Structural and physiological char-  
556 acterization during wheat pericarp development. *Plant Cell Reports* **32**: 1309–1320.
- 557 **Xuan YH, Hu YB, Chen L-Q, Sosso D, Ducat DC, Hou B-H, Frommer WB. 2013.**  
558 Functional role of oligomerization for bacterial and plant SWEET sugar transporter fam-  
559 ily. *Proceedings of the National Academy of Sciences of the USA* **110**: E3685-3694.
- 560 **Yang B, Sugio A, White FF. 2006.** *Os8N3* is a host disease-susceptibility gene for bac-  
561 terial blight of rice. *Proceedings of the National Academy of Sciences of the USA* **103**:  
562 10503–10508.

- 563 **Yuan M, Chu Z, Li X, Xu C, Wang S. 2010.** The bacterial pathogen *Xanthomonas ory-*  
564 *zae* overcomes rice defenses by regulating host copper redistribution. *The Plant Cell*  
565 **22**: 3164–3176.
- 566 **Zhou H, Liu B, Weeks DP, Spalding MH, Yang B. 2014.** Large chromosomal deletions  
567 and heritable small genetic changes induced by CRISPR/Cas9 in rice. *Nucleic Acids*  
568 *Research* **42**: 10903–10914.
- 569 **Zhou Y, Qu H, Dibley KE, Offler CE, Patrick JW. 2007.** A suite of sucrose transport-  
570 ers expressed in coats of developing legume seeds includes novel pH-independent fa-  
571 cilitators. *The Plant Journal* **49**: 750–64.

572 **Figure Legends and Tables**

573

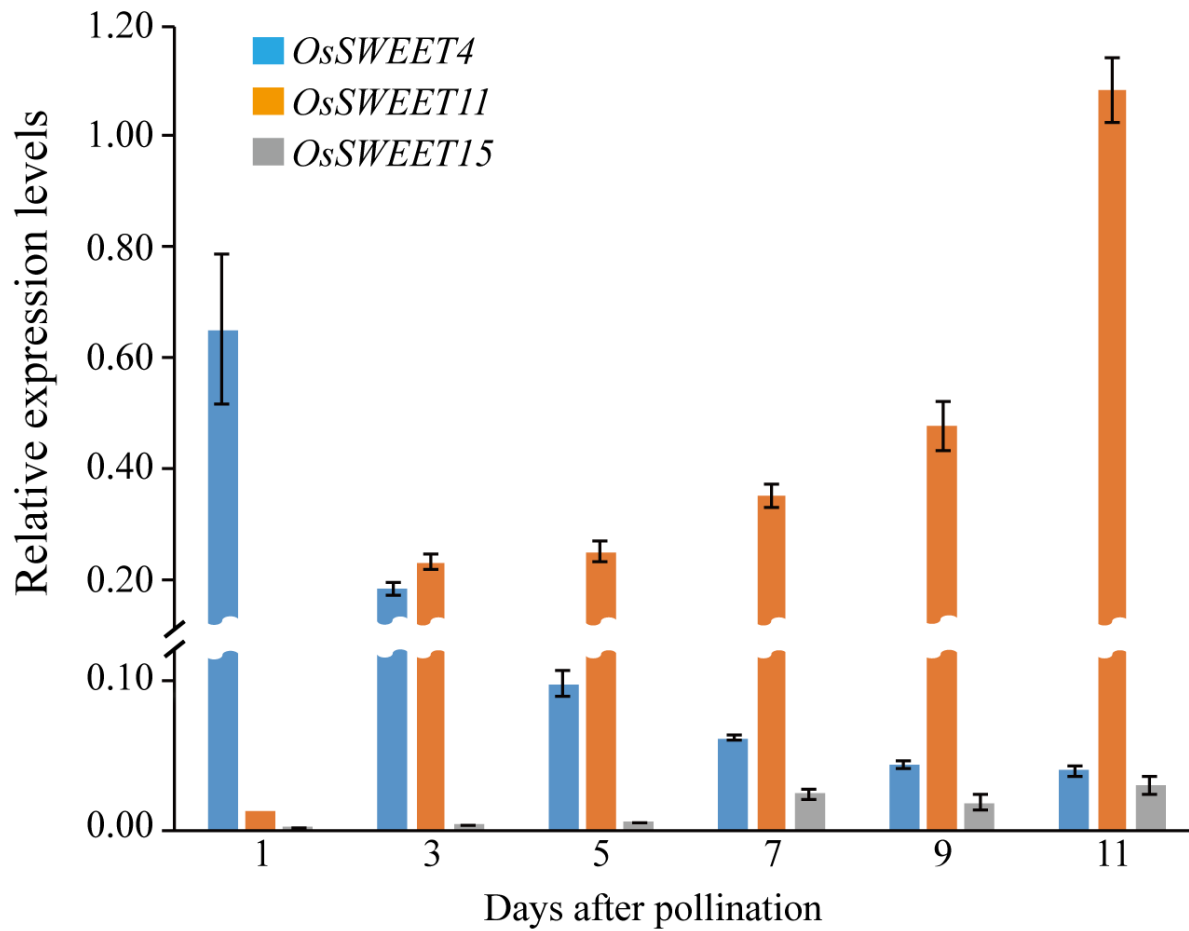

574

575 **Fig. 1.** Relative expression of *OsSWEET4*, *OsSWEET11* and *OsSWEET15* during rice  
576 seed development. Expression was measured with quantitative RT-PCR (qRT-PCR) in  
577 wild-type greenhouse-grown seeds. Data was shown as mean  $\pm$  s.e.m., n=3; expression  
578 levels were normalized to rice Ubiquitin1 levels.



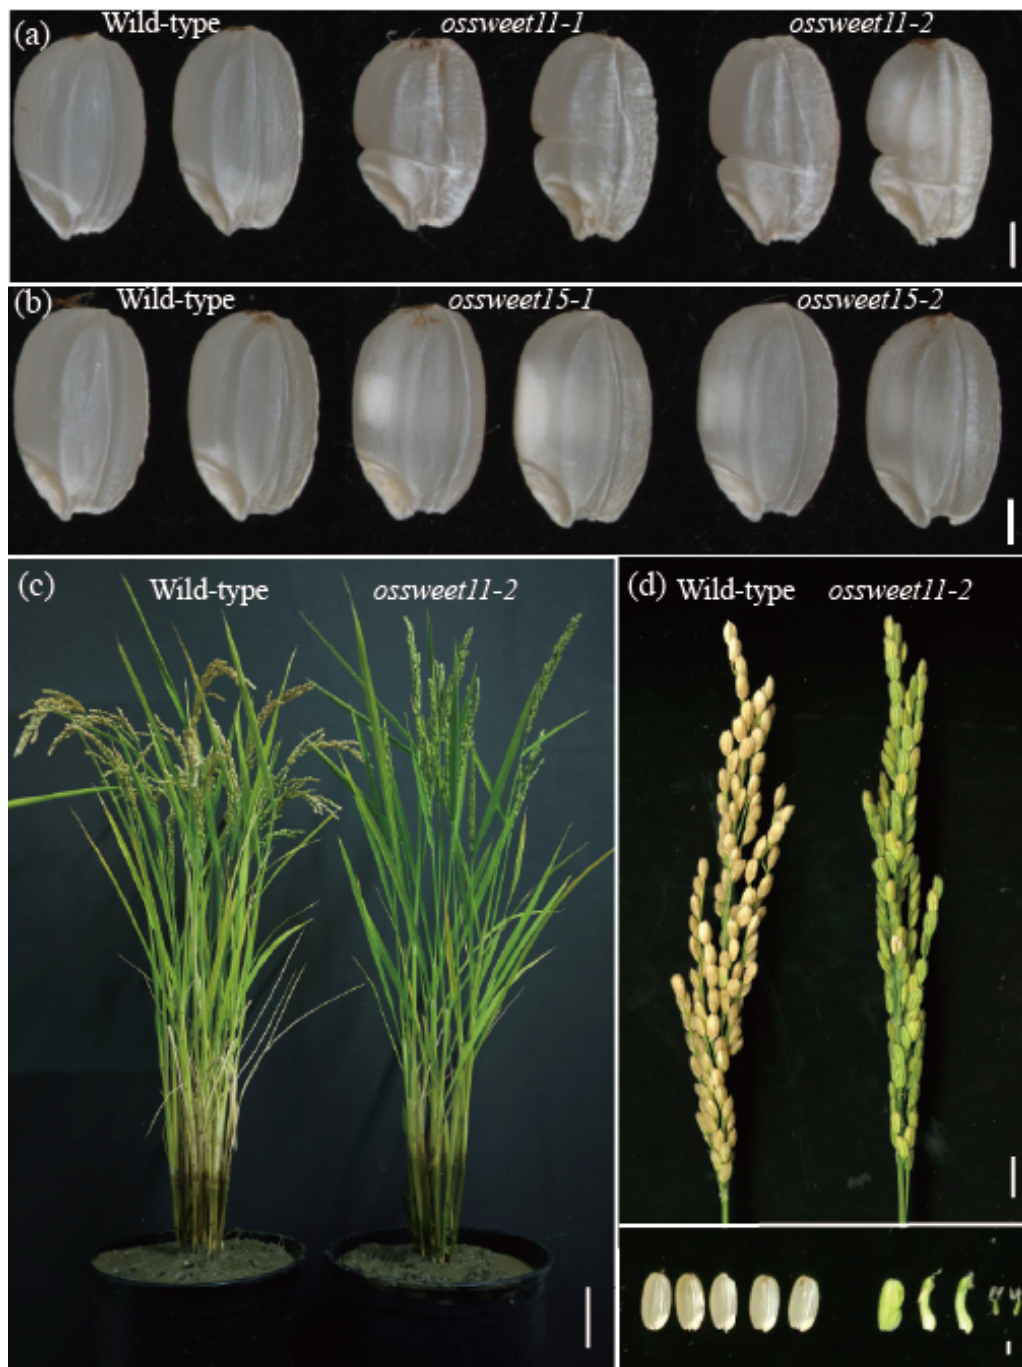

579

580

581 **Fig. 2** Phenotypes of wild-type, *ossweet11* and *ossweet15* mutants. **(a)** Mature caryopses  
582 phenotype of WT and *ossweet11* mutants (Stanford greenhouse). **(b)** Mature caryopses  
583 phenotype of WT and *ossweet15* mutants (Stanford greenhouse). **(c)** Plant phenotype of  
584 a mature *ossweet11-2* mutant grown in a paddy field and transferred to pot for photog-  
585 raphy (Stanford field, 40 DAP). **(d)** Phenotypes of panicle and grains for wild-type and the  
586 *ossweet11-2* mutant in paddy conditions (Stanford field, 40 DAP). Scale bars: 1 mm in (a  
587 and b), 10 cm in (c), 1 cm in upper panel and 1 mm in lower panel (d).

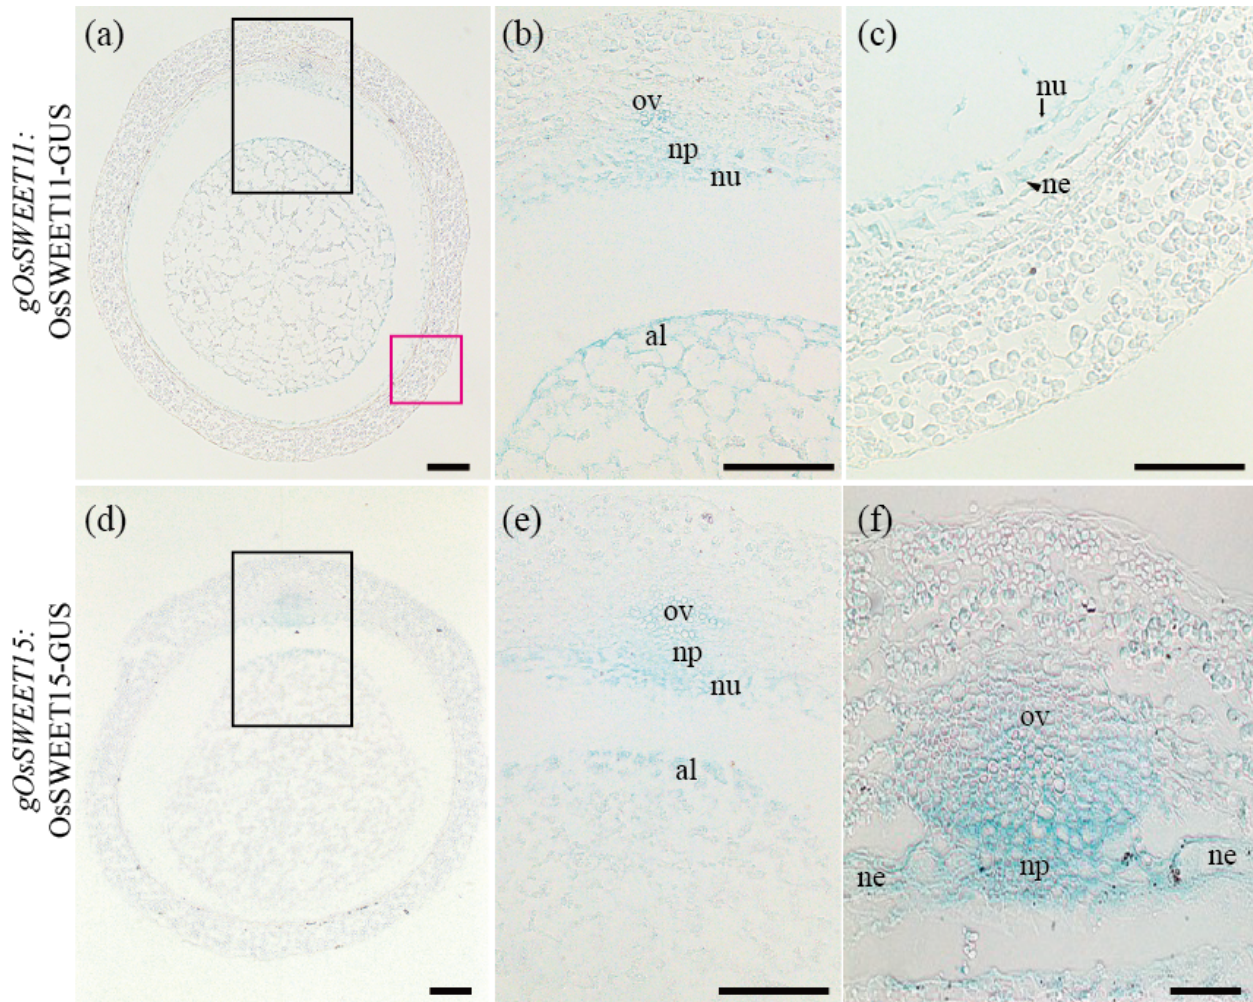

588

589 **Fig. 3** Tissue specific expression of OsSWEET11 and OsSWEET15 in rice grains.

590 **(a)** Transverse section of *gOsSWEET11:gOsSWEET11-GUS* grain at 5 DAP. **(b)** Black  
591 boxed area in (a), showing GUS activity in the ovular vascular trace (ov), nucellus (nu),  
592 nucellar projection (np) and aleurone (al). **(c)** Red boxed area in (a), showing activity in  
593 the nu (black arrow) and ne, nucellar epidermis (black arrowhead).

594 **(d)** *OsSWEET15 GUS* activity in grains at 5 DAP. **(e)** Black boxed area in (d), GUS ac-  
595 tivities detected in ov, np, nu and al. **(f)** *OsSWEET15 GUS* activity in developing grains  
596 was detected to the ov, np and ne at 9 DAP. Scale bars: 50  $\mu$ m.

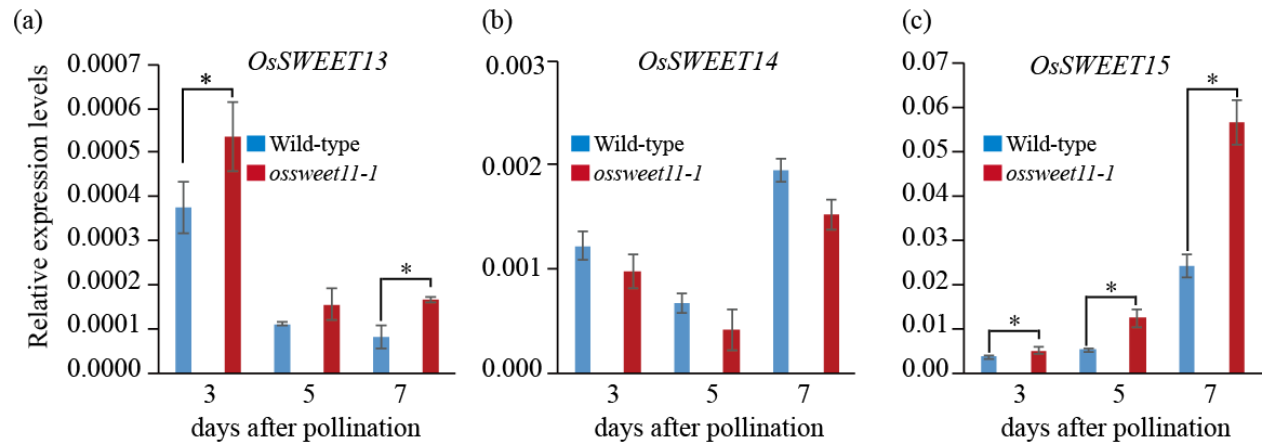

597

598 **Fig. 4** Expression levels of clade 3 SWEET genes in *ossweet11-1* mutant.

599 Relative expression levels of *OsSWEET13* (a), *OsSWEET14* (b) and *OsSWEET15* (c)  
600 was measured with quantitative RT-PCR (qRT-PCR) in wild-type and *sweet11*. Expres-  
601 sion of *OsSWEET13* and *OsSWEET15* were increased in the *ossweet11-1* mutant com-  
602 pared to wild-type (\* $p < 0.05$ ). Data was shown as mean  $\pm$  s.e.m.,  $n=3$ ; expression levels  
603 were normalized to rice *Ubiquitin1* levels. *OsSWEET12* transcripts were not detected.



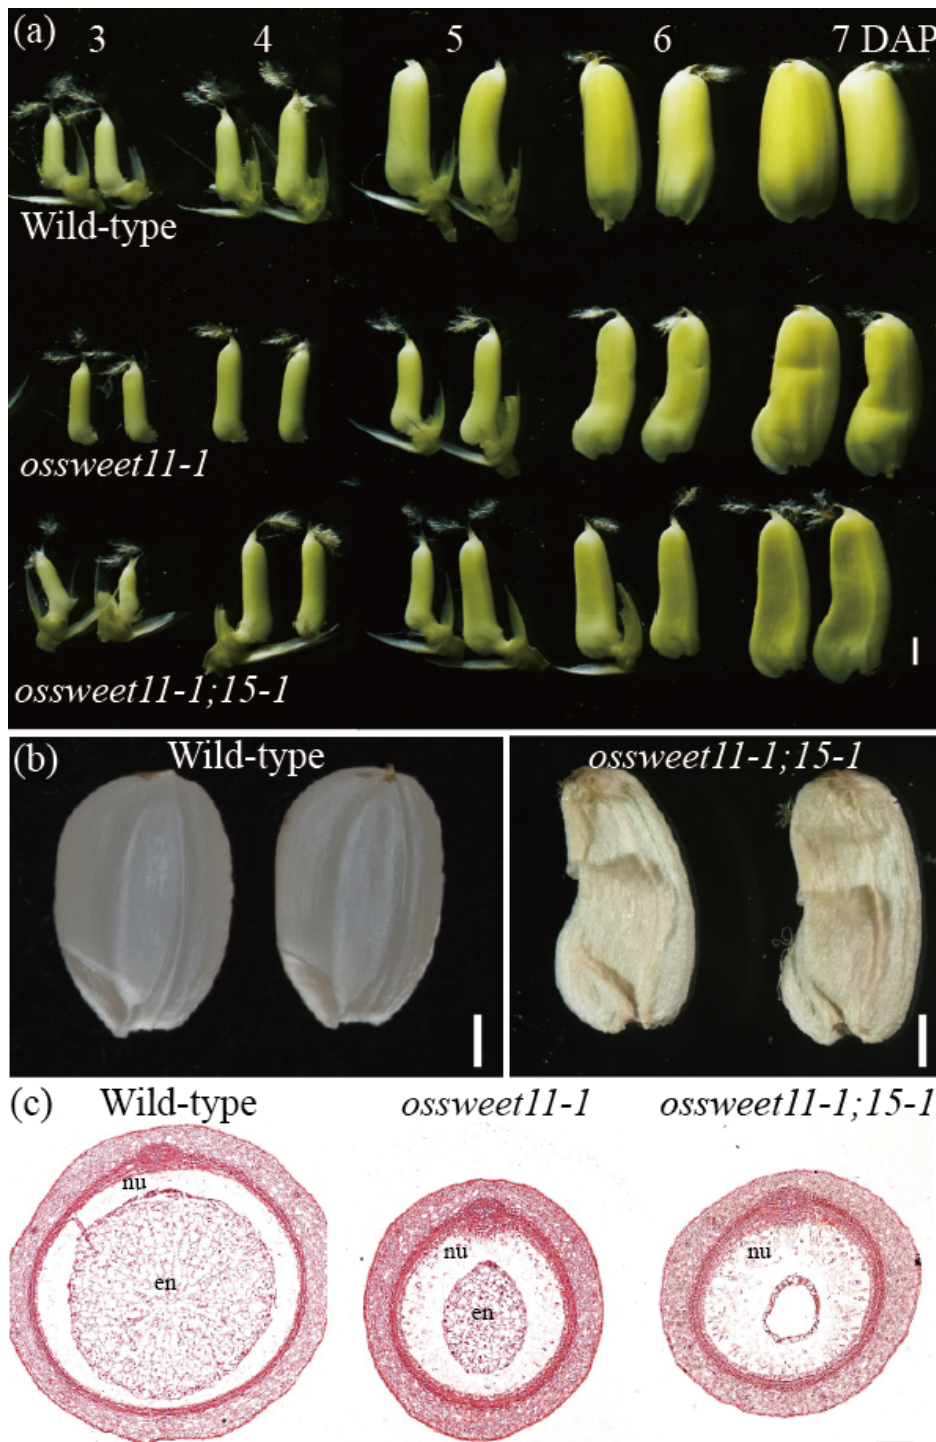

604

605 **Fig. 5** Endosperm deficiency phenotype of the *ossweet11;15* double mutant. (a) Morpho-  
606 logical changes of wild-type, *ossweet11-1* and *ossweet11-1;15-1* from 3 DAP to 7 DAP  
607 (Stanford greenhouse). (b) Wild-type and *ossweet11-1;15-1* double mutant seeds at ma-  
608 turity (Stanford greenhouse). (c) Transverse sections of wild-type, *ossweet11-1* and  
609 *ossweet11-1;15-1* seeds at 5 DAP stained with Safranin O. nu, nucellus; en, endosperm.

610

Scale bars: 1 mm in (a and b), 50  $\mu$ m in (c).

611

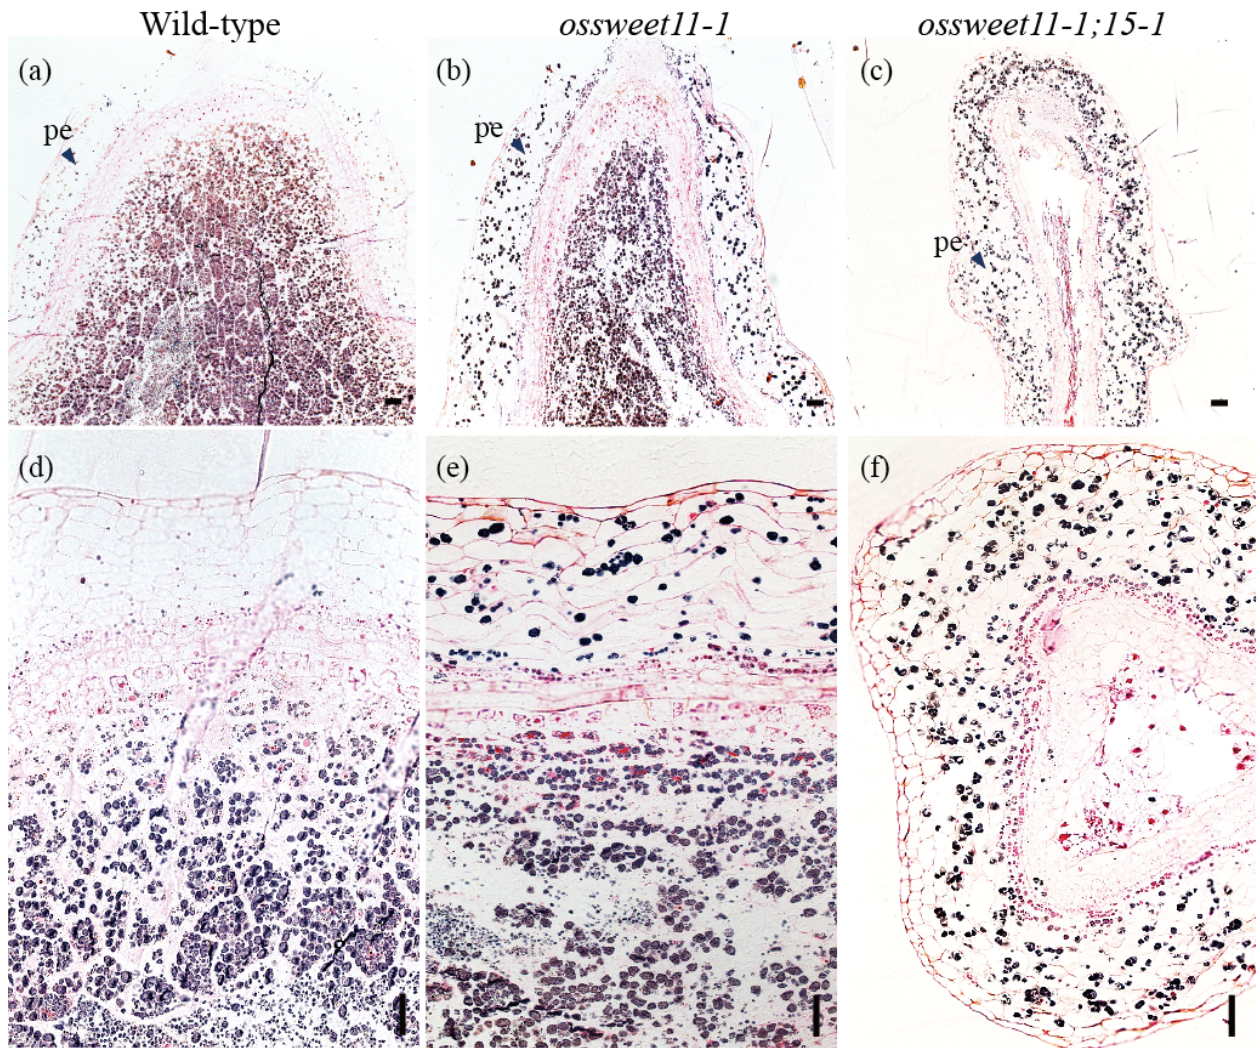

612

613 **Fig. 6** Accumulation of starch in the pericarp of *ossweet11-1* and *ossweet11-1;15-1* mu-  
614 tants.

615 **(a-c)** Cross section of seeds stained with Lugol's iodine solution at 9 DPA. pe, pericarp.

616 **(e-f)** Magnified image of (a-c). Scale bars: 50  $\mu$ m.



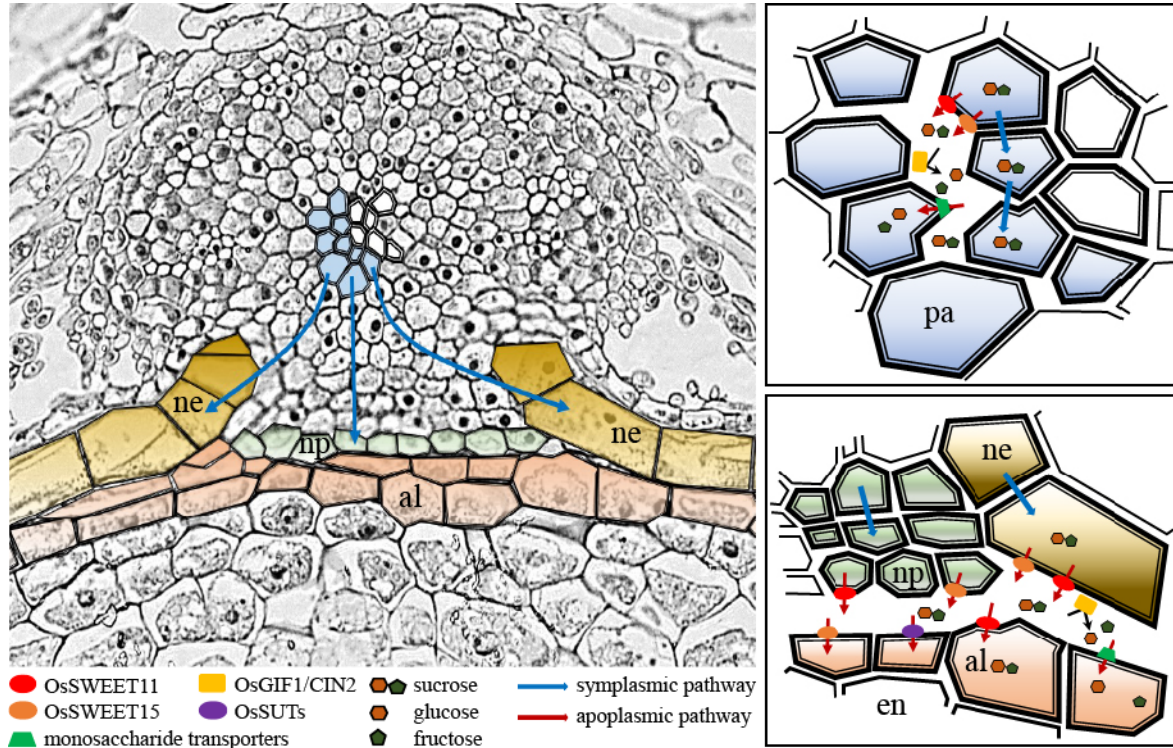

617

618 **Fig. 7** Proposed model for sugar unloading in rice caryopsis. Possible apoplasmic  
 619 transport routes as indicated by SWEET sucrose transporter localization.

620 The model was made based morphological observations from this study and previous  
 621 studies (Oparka & Gates, 1981a,b; Wu *et al.*, 2016). Sucrose may move from the  
 622 phloem to parenchyma cells in the ovular vascular bundle and then to nucellar projec-  
 623 tion and the nucellar epidermis through symplasmic pathway via plasmadesmata (a).  
 624 We surmise that OsSWEET11 and OsSWEET15 mediates sucrose export from xylem  
 625 parenchyma cells into the apoplasmic space (b). In addition, OsSWEET11 and  
 626 OsSWEET15 may be involved in sucrose export out of cells at the nucellar projection  
 627 and the nucellar epidermis to apoplasm. followed by import into the aleurone in endo-  
 628 sperm (c). Transfer across the nucellar epidermis/aleurone would require a sucrose gra-  
 629 dient across both cell types. al, aleurone; ne, nucella epidermis; np, nucellar projection;  
 630 pa, parenchyma.
